# Supplementary material for: Gender-based time discrepancy in diagnosis of coronary artery disease based on data analytics of electronic medical records
Source: Front Cardiovasc Med. 2022 Nov 24;9:969325. doi: 10.3389/fcvm.2022.969325 (PMC9729739; doi:10.3389/fcvm.2022.969325)
Supplement: Supplementary file 3 [file Table_3.CSV]

Code	Name
11365	STATIN
9221	CARDIOVASCULAR
110556	ANTICOAGULANTS
679	ASPIRIN
11664	ANTICOAGULANTS
6242	CARDIOVASCULAR
2833	CARDIOVASCULAR
8751	ANTICOAGULANTS
1755	CARDIOVASCULAR
9222	CARDIOVASCULAR
9223	CARDIOVASCULAR
3697	CARDIOVASCULAR
10176	ANTICOAGULANTS
10372	BETA-BLOCKERS
9957	CARDIOVASCULAR
8752	ANTICOAGULANTS
9220	CARDIOVASCULAR
688	ASPIRIN
37637	BETA-BLOCKERS
104992	ANTICOAGULANTS
4459	CARDIAC-DRUGS
24711	CARDIOVASCULAR
717	BETA-BLOCKERS
19177	STATIN
11112	STATIN
14824	CARDIOVASCULAR
15981	CARDIAC-DRUGS
262647	CARDIOVASCULAR
9069	CARDIAC-DRUGS
14551	CARDIOVASCULAR
94576	CARDIAC-DRUGS
19176	STATIN
10181	ANTICOAGULANTS
14823	CARDIOVASCULAR
22588	CARDIOVASCULAR
110550	ANTICOAGULANTS
70434	RANOLAZINE
104989	ANTICOAGULANTS
9070	CARDIAC-DRUGS
11367	STATIN
200962	ANTICOAGULANTS
19178	STATIN
5603	NITRATE
24268	NITRATE
30071	BETA-BLOCKERS
681	ASPIRIN
28645	STATIN
30072	BETA-BLOCKERS
200961	ANTICOAGULANTS
18287	BETA-BLOCKERS
18551	BETA-BLOCKERS
15845	ANTICOAGULANTS
9931	ANTICOAGULANTS
104990	ANTICOAGULANTS
11259	CARDIOVASCULAR
5604	NITRATE
104991	ANTICOAGULANTS
185935	CARDIOVASCULAR
206549	ANTICOAGULANTS
5008	BETA-BLOCKERS
22142	ANTIPLATELET
8750	ANTICOAGULANTS
5007	BETA-BLOCKERS
29858	BETA-BLOCKERS
11111	STATIN
10470	STATIN
89285	BETA-BLOCKERS
30978	ASPIRIN
3701	CARDIOVASCULAR
31209	CARDIOVASCULAR
15749	BETA-BLOCKERS
206513	ANTICOAGULANTS
30070	BETA-BLOCKERS
10449	CARDIOVASCULAR
8529	CALCIUM-ANTAGONIST
107427	CARDIOVASCULAR
1756	CARDIOVASCULAR
13089	CARDIOVASCULAR
27335	CALCIUM-ANTAGONIST
33541	CARDIOVASCULAR
15748	BETA-BLOCKERS
23230	CARDIOVASCULAR
41893	CARDIOVASCULAR
14958	CARDIOVASCULAR
36612	STATIN
202406	BETA-BLOCKERS
10450	CARDIOVASCULAR
29264	CARDIAC-DRUGS
9897	CARDIOVASCULAR
15747	BETA-BLOCKERS
32762	CARDIOVASCULAR
9071	CARDIAC-DRUGS
10374	BETA-BLOCKERS
24384	CARDIOVASCULAR
35135	STATIN
36607	STATIN
10451	CARDIOVASCULAR
35134	STATIN
4526	CARDIOVASCULAR
11366	STATIN
24571	CARDIOVASCULAR
9066	CARDIAC-DRUGS
14553	CARDIOVASCULAR
5009	BETA-BLOCKERS
11639	CALCIUM-ANTAGONIST
126040	CARDIOVASCULAR
6030	CARDIOVASCULAR
125087	BETA-BLOCKERS
718	BETA-BLOCKERS
32215	ANTICOAGULANTS
6656	BETA-BLOCKERS
138102	CARDIOVASCULAR
5599	NITRATE
9894	CARDIOVASCULAR
112732	ANTICOAGULANTS
14550	CARDIOVASCULAR
8527	CALCIUM-ANTAGONIST
15858	NITRATE
123016	STATIN
9895	CARDIOVASCULAR
10375	BETA-BLOCKERS
40800032	CARDIAC-DRUGS
21848	CARDIOVASCULAR
199057	ANTICOAGULANTS
112008	ANTICOAGULANTS
14205	ANTICOAGULANTS
4068	NITRATE
4064	NITRATE
27507	CARDIOVASCULAR
5606	NITRATE
27334	CALCIUM-ANTAGONIST
685	ASPIRIN
27333	CALCIUM-ANTAGONIST
201015	BETA-BLOCKERS
10373	BETA-BLOCKERS
5558	CALCIUM-ANTAGONIST
3700	CARDIOVASCULAR
27506	CARDIOVASCULAR
200965	ANTICOAGULANTS
90999	ANTICOAGULANTS
3698	CARDIOVASCULAR
11364	STATIN
32128	STATIN
10469	STATIN
6657	BETA-BLOCKERS
41832	CARDIOVASCULAR
11421	CARDIOVASCULAR
11110	STATIN
142651	CARDIOVASCULAR
1757	CARDIOVASCULAR
144881	CARDIOVASCULAR
693	ASPIRIN
3699	CARDIOVASCULAR
27096	NITRATE
2444	CARDIAC-DRUGS
126542	BETA-BLOCKERS
144155	STATIN
29805	CARDIOVASCULAR
24521	NITRATE
27278	NITRATE
133116	CARDIOVASCULAR
36959	CARDIAC-DRUGS
8975	CARDIAC-DRUGS
14552	CARDIOVASCULAR
15848	ANTICOAGULANTS
110555	ANTICOAGULANTS
31211	CARDIOVASCULAR
76357	CARDIOVASCULAR
22651	CARDIOVASCULAR
15859	NITRATE
199042	CARDIAC-DRUGS
199043	CARDIAC-DRUGS
107013	ANTICOAGULANTS
43230	CARDIOVASCULAR
27480	CALCIUM-ANTAGONIST
122880	ASPIRIN
27474	NITRATE
9869	CALCIUM-ANTAGONIST
102724	CARDIAC-DRUGS
14100	CALCIUM-ANTAGONIST
2475	CALCIUM-ANTAGONIST
40800779	CALCIUM-ANTAGONIST
43556	CARDIAC-DRUGS
10177	ANTICOAGULANTS
144877	CARDIOVASCULAR
9925	CARDIOVASCULAR
9401	CARDIOVASCULAR
113900	ANTICOAGULANTS
29481	CARDIAC-DRUGS
194984	CARDIAC-DRUGS
22982	BETA-BLOCKERS
38224	BETA-BLOCKERS
2474	CALCIUM-ANTAGONIST
10596	CARDIAC-DRUGS
76437	CARDIOVASCULAR
40802054	ANTICOAGULANTS
76438	CARDIOVASCULAR
35136	STATIN
13161	CARDIOVASCULAR
39221	CARDIOVASCULAR
87834	BETA-BLOCKERS
5115	CARDIOVASCULAR
10041	CARDIAC-DRUGS
76356	CARDIOVASCULAR
9152	ASPIRIN
25238	CALCIUM-ANTAGONIST
40800020	BETA-BLOCKERS
27491	CARDIAC-DRUGS
36332	ANTICOAGULANTS
36070	CARDIOVASCULAR
10043	CARDIAC-DRUGS
19434	ANTICOAGULANTS
89346	ANTIPLATELET
37643	CARDIAC-DRUGS
11146	CARDIAC-DRUGS
29272	CALCIUM-ANTAGONIST
37644	CARDIAC-DRUGS
39803	ANTICOAGULANTS
37879	CARDIAC-DRUGS
2445	CARDIAC-DRUGS
21372	ANTICOAGULANTS
206550	ANTICOAGULANTS
6658	BETA-BLOCKERS
6468	CARDIOVASCULAR
25100	CARDIOVASCULAR
88007	RANOLAZINE
31210	CARDIOVASCULAR
27505	CARDIOVASCULAR
24336	CARDIOVASCULAR
716	BETA-BLOCKERS
5600	NITRATE
19433	ANTICOAGULANTS
8748	ANTICOAGULANTS
12732	CARDIOVASCULAR
5559	CALCIUM-ANTAGONIST
11253	CARDIOVASCULAR
199195	ANTIPLATELET
29274	CALCIUM-ANTAGONIST
6470	CARDIOVASCULAR
126751	STATIN
9167	BETA-BLOCKERS
32761	CARDIOVASCULAR
82307	CARDIOVASCULAR
9927	CARDIOVASCULAR
133058	STATIN
143650	CARDIOVASCULAR
10719	CALCIUM-ANTAGONIST
145569	ANTICOAGULANTS
18288	BETA-BLOCKERS
32763	CARDIOVASCULAR
206515	ANTICOAGULANTS
22650	CARDIOVASCULAR
6660	BETA-BLOCKERS
9896	CARDIOVASCULAR
10720	CALCIUM-ANTAGONIST
31227	CARDIOVASCULAR
113976	ANTICOAGULANTS
38226	BETA-BLOCKERS
37661	BETA-BLOCKERS
37855	CARDIOVASCULAR
8749	ANTICOAGULANTS
219542	ANTICOAGULANTS
5605	NITRATE
87851	BETA-BLOCKERS
14738	ASPIRIN
9928	CARDIOVASCULAR
27490	CARDIAC-DRUGS
6469	CARDIOVASCULAR
10471	STATIN
194863	ANTICOAGULANTS
10150	CARDIOVASCULAR
10094	CARDIOVASCULAR
82363	CARDIOVASCULAR
122340	CARDIAC-DRUGS
98373	ANTIPLATELET
9984	CARDIOVASCULAR
19548	ANTICOAGULANTS
40803356	ANTICOAGULANTS
18315	CARDIAC-DRUGS
9065	CARDIAC-DRUGS
14961	CARDIAC-DRUGS
14868	CARDIAC-DRUGS
35500	BETA-BLOCKERS
2476	CALCIUM-ANTAGONIST
40800014	CARDIOVASCULAR
134376	CARDIOVASCULAR
135743	CARDIAC-DRUGS
40801518	ANTICOAGULANTS
36608	STATIN
218376	CARDIOVASCULAR
133256	ANTICOAGULANTS
223141	CARDIOVASCULAR
5330	BETA-BLOCKERS
199320	ANTICOAGULANTS
14869	CARDIAC-DRUGS
10149	CARDIOVASCULAR
29349	CARDIAC-DRUGS
5185	CARDIOVASCULAR
4065	NITRATE
29277	CALCIUM-ANTAGONIST
29171	STATIN
133240	CARDIOVASCULAR
24335	CARDIOVASCULAR
29176	CARDIOVASCULAR
9926	CARDIOVASCULAR
9924	CARDIOVASCULAR
145574	ANTICOAGULANTS
2528	ANTIPLATELET
2530	ANTIPLATELET
39222	CARDIOVASCULAR
21849	CARDIOVASCULAR
29275	CALCIUM-ANTAGONIST
36609	STATIN
127862	CARDIOVASCULAR
31921	ANTICOAGULANTS
10452	CARDIOVASCULAR
9588	CARDIOVASCULAR
37482	CARDIOVASCULAR
25248	CALCIUM-ANTAGONIST
23151	CALCIUM-ANTAGONIST
10453	CARDIOVASCULAR
221768	CARDIAC-DRUGS
140218	STATIN
127751	CARDIAC-DRUGS
137653	ANTIPLATELET
123265	ASPIRIN
10722	CALCIUM-ANTAGONIST
210089	CALCIUM-ANTAGONIST
36068	CARDIOVASCULAR
18908	CARDIOVASCULAR
223140	CARDIOVASCULAR
223142	CARDIOVASCULAR
6655	BETA-BLOCKERS
110553	ANTICOAGULANTS
226810	BETA-BLOCKERS
9589	CARDIOVASCULAR
23449	STATIN
88550	CARDIOVASCULAR
5618	NITRATE
126671	CARDIOVASCULAR
133118	CARDIOVASCULAR
38225	BETA-BLOCKERS
21847	CARDIOVASCULAR
122888	ASPIRIN
78533	BETA-BLOCKERS
23123	ANTIPLATELET
23124	ANTIPLATELET
36606	STATIN
98372	ANTIPLATELET
134137	BETA-BLOCKERS
98381	ANTIPLATELET
123703	CARDIOVASCULAR
131192	CARDIOVASCULAR
5331	BETA-BLOCKERS
26965	CARDIAC-DRUGS
26966	CARDIAC-DRUGS
26967	CARDIAC-DRUGS
682	ASPIRIN
223971	ANTIPLATELET
123680	CARDIOVASCULAR
35639	CARDIOVASCULAR
40800013	CARDIOVASCULAR
40801417	CARDIOVASCULAR
13884	CARDIOVASCULAR
100367	CARDIOVASCULAR
12218	CARDIOVASCULAR
29278	CALCIUM-ANTAGONIST
10595	CARDIAC-DRUGS
77664	BETA-BLOCKERS
11261	CARDIOVASCULAR
133239	CARDIOVASCULAR
223925	CARDIOVASCULAR
195545	CARDIOVASCULAR
31419	BETA-BLOCKERS
32760	CARDIOVASCULAR
15822	ANTICOAGULANTS
25088	CARDIOVASCULAR
8531	CALCIUM-ANTAGONIST
8528	CALCIUM-ANTAGONIST
132577	BETA-BLOCKERS
14822	CARDIOVASCULAR
29351	CARDIAC-DRUGS
89306	BETA-BLOCKERS
12731	CARDIOVASCULAR
36069	CARDIOVASCULAR
36276	CARDIOVASCULAR
32934	CARDIOVASCULAR
113609	CARDIOVASCULAR
98325	CARDIOVASCULAR
82308	CARDIOVASCULAR
40801590	CARDIOVASCULAR
99727	CARDIOVASCULAR
103547	ANTICOAGULANTS
214814	CARDIAC-DRUGS
214813	CARDIAC-DRUGS
89284	BETA-BLOCKERS
123000	BETA-BLOCKERS
17019	CARDIOVASCULAR
6654	BETA-BLOCKERS
6659	BETA-BLOCKERS
40800057	CARDIOVASCULAR
40800917	BETA-BLOCKERS
14820	CARDIOVASCULAR
40801985	NITRATE
23232	CARDIOVASCULAR
32933	CARDIOVASCULAR
40800051	BETA-BLOCKERS
40800012	CARDIOVASCULAR
40801360	BETA-BLOCKERS
32931	CARDIOVASCULAR
40800002	CARDIOVASCULAR
32932	CARDIOVASCULAR
40802108	CARDIOVASCULAR
40803089	CARDIOVASCULAR
40803090	CARDIOVASCULAR
40803088	CARDIOVASCULAR
40803091	CARDIOVASCULAR
216721	CARDIOVASCULAR
216720	CARDIOVASCULAR
216719	CARDIOVASCULAR
23231	CARDIOVASCULAR
23229	CARDIOVASCULAR
683	ASPIRIN
77665	BETA-BLOCKERS
138592	BETA-BLOCKERS
39214	CARDIOVASCULAR
31733	CARDIOVASCULAR
33539	CARDIOVASCULAR
28650	STATIN
200964	ANTICOAGULANTS
195991	NITRATE
126662	ANTICOAGULANTS
40800037	BETA-BLOCKERS
146426	ANTICOAGULANTS
98329	CARDIAC-DRUGS
16388	CARDIOVASCULAR
128052	BETA-BLOCKERS
135604	NITRATE
70607	CARDIAC-DRUGS
673	ASPIRIN
37851	CARDIOVASCULAR
145632	ANTICOAGULANTS
4066	NITRATE
133254	STATIN
29609	CARDIAC-DRUGS
138096	STATIN
93344	CARDIOVASCULAR
224240	CARDIOVASCULAR
40800036	BETA-BLOCKERS
27644	ANTIPLATELET
10169	ANTICOAGULANTS
27180	CALCIUM-ANTAGONIST
134140	BETA-BLOCKERS
31740	CARDIOVASCULAR
9640	CARDIOVASCULAR
214799	CARDIOVASCULAR
225281	CARDIOVASCULAR
225273	CARDIOVASCULAR
24474	ANTIPLATELET
8530	CALCIUM-ANTAGONIST
9400	CARDIOVASCULAR
6562	CARDIAC-DRUGS
18289	CARDIOVASCULAR
18290	CARDIOVASCULAR
11640	CALCIUM-ANTAGONIST
37662	CALCIUM-ANTAGONIST
145043	CARDIOVASCULAR
33111	CARDIOVASCULAR
31875	CARDIOVASCULAR
40413	CARDIOVASCULAR
23210	ANTICOAGULANTS
106880	ANTICOAGULANTS
78653	CARDIOVASCULAR
37849	CARDIOVASCULAR
32482	CARDIOVASCULAR
23150	CALCIUM-ANTAGONIST
135520	CALCIUM-ANTAGONIST
29346	CALCIUM-ANTAGONIST
10095	CARDIOVASCULAR
35177	CALCIUM-ANTAGONIST
11260	CARDIOVASCULAR
29396	ANTICOAGULANTS
22455	ANTIPLATELET
11254	CARDIOVASCULAR
29276	CALCIUM-ANTAGONIST
141587	CARDIOVASCULAR
135519	CALCIUM-ANTAGONIST
82364	CARDIOVASCULAR
145039	CARDIOVASCULAR
27499	CALCIUM-ANTAGONIST
20880	CARDIOVASCULAR
143653	CARDIOVASCULAR
122881	ASPIRIN
135595	NITRATE
226468	ANTICOAGULANTS
199201	ANTIPLATELET
141411	CARDIAC-DRUGS
143713	ANTICOAGULANTS
202949	ANTICOAGULANTS
4982	CARDIOVASCULAR
10356	NITRATE
11147	CARDIAC-DRUGS
11252	CARDIOVASCULAR
27106	CARDIAC-DRUGS
40800115	CALCIUM-ANTAGONIST
82336	CARDIOVASCULAR
132090	NITRATE
13160	CARDIOVASCULAR
37645	CARDIAC-DRUGS
144628	STATIN
4069	NITRATE
9403	CARDIOVASCULAR
144629	STATIN
29279	CALCIUM-ANTAGONIST
25089	CARDIOVASCULAR
35179	CALCIUM-ANTAGONIST
214872	CARDIOVASCULAR
139192	CARDIOVASCULAR
197939	CARDIAC-DRUGS
29273	CALCIUM-ANTAGONIST
77804	CARDIAC-DRUGS
29348	CALCIUM-ANTAGONIST
185863	CARDIOVASCULAR
1963	ANTICOAGULANTS
31421	BETA-BLOCKERS
21118	STATIN
1966	ANTICOAGULANTS
87895	CARDIOVASCULAR
134975	BETA-BLOCKERS
142057	BETA-BLOCKERS
686	ASPIRIN
29398	CARDIOVASCULAR
130940	ANTICOAGULANTS
97266	BETA-BLOCKERS
14895	NITRATE
145040	CARDIOVASCULAR
145042	CARDIOVASCULAR
112863	CARDIAC-DRUGS
6778	CARDIAC-DRUGS
127816	CALCIUM-ANTAGONIST
35178	CALCIUM-ANTAGONIST
10591	BETA-BLOCKERS
124998	CARDIAC-DRUGS
144627	STATIN
144646	STATIN
39220	CARDIOVASCULAR
40803333	CARDIOVASCULAR
122329	CARDIAC-DRUGS
145256	ANTICOAGULANTS
77666	BETA-BLOCKERS
109787	ANTICOAGULANTS
28372	CARDIOVASCULAR
132088	NITRATE
29347	CALCIUM-ANTAGONIST
35592	CARDIAC-DRUGS
40802793	ANTICOAGULANTS
77667	BETA-BLOCKERS
216567	BETA-BLOCKERS
223246	CARDIOVASCULAR
32759	CARDIOVASCULAR
99462	BETA-BLOCKERS
29350	CARDIAC-DRUGS
143179	CALCIUM-ANTAGONIST
11251	CARDIOVASCULAR
29172	STATIN
27107	CARDIAC-DRUGS
195983	BETA-BLOCKERS
12412	STATIN
12514	STATIN
11258	CARDIOVASCULAR
125000	CARDIOVASCULAR
10042	CARDIAC-DRUGS
89305	BETA-BLOCKERS
2535	CARDIAC-DRUGS
16156	CARDIAC-DRUGS
9929	CARDIOVASCULAR
4983	CARDIOVASCULAR
10713	CARDIAC-DRUGS
87818	CARDIOVASCULAR
138095	STATIN
132086	NITRATE
122668	CARDIOVASCULAR
40800094	CARDIOVASCULAR
2477	CALCIUM-ANTAGONIST
29397	CARDIOVASCULAR
29867	BETA-BLOCKERS
37853	CARDIOVASCULAR
31876	CARDIOVASCULAR
11419	CARDIOVASCULAR
112006	ANTICOAGULANTS
122875	ASPIRIN
88230	ANTICOAGULANTS
112007	ANTICOAGULANTS
98338	CARDIAC-DRUGS
29271	CALCIUM-ANTAGONIST
77803	CARDIAC-DRUGS
26801	ANTIPLATELET
203904	CARDIAC-DRUGS
82365	CARDIOVASCULAR
27471	NITRATE
89286	BETA-BLOCKERS
195909	CARDIOVASCULAR
105121	ANTICOAGULANTS
14821	CARDIOVASCULAR
10172	ANTICOAGULANTS
89698	CARDIOVASCULAR
5114	CARDIOVASCULAR
141399	CARDIOVASCULAR
15723	CARDIOVASCULAR
40800018	CARDIOVASCULAR
28857	CARDIOVASCULAR
5332	BETA-BLOCKERS
35595	CARDIAC-DRUGS
19254	ASPIRIN
41793	CARDIOVASCULAR
11148	CARDIAC-DRUGS
24473	ANTIPLATELET
12370	CARDIAC-DRUGS
37850	CARDIOVASCULAR
24341	CARDIOVASCULAR
146865	STATIN
10712	CARDIAC-DRUGS
205127	NITRATE
14101	CALCIUM-ANTAGONIST
12733	CARDIOVASCULAR
29269	CALCIUM-ANTAGONIST
124057	CARDIOVASCULAR
139573	STATIN
91079	CARDIAC-DRUGS
128648	CARDIOVASCULAR
138451	CARDIAC-DRUGS
78654	CARDIOVASCULAR
82366	CARDIOVASCULAR
133217	BETA-BLOCKERS
138452	CARDIAC-DRUGS
40801710	CARDIOVASCULAR
147484	CARDIOVASCULAR
143002	CARDIOVASCULAR
227121	BETA-BLOCKERS
192234	CARDIOVASCULAR
195908	CARDIOVASCULAR
27105	CARDIAC-DRUGS
147196	ANTICOAGULANTS
14369	ANTIPLATELET
9402	CARDIOVASCULAR
134166	CARDIAC-DRUGS
40801416	ASPIRIN
40801415	ASPIRIN
40801950	CARDIAC-DRUGS
211550	CARDIOVASCULAR
265150	CARDIOVASCULAR
17017	CARDIOVASCULAR
123681	CARDIOVASCULAR
17018	CARDIOVASCULAR
31901	CARDIOVASCULAR
82338	CARDIOVASCULAR
225280	CARDIOVASCULAR
122070	CARDIOVASCULAR
88549	CARDIOVASCULAR
202397	BETA-BLOCKERS
102218	NITRATE
38831	CARDIOVASCULAR
40801414	BETA-BLOCKERS
135482	CARDIOVASCULAR
97794	CARDIOVASCULAR
330	CARDIOVASCULAR
6858	CARDIOVASCULAR
9166	BETA-BLOCKERS
12086	ASPIRIN
125113	CARDIOVASCULAR
138409	CARDIOVASCULAR
141576	BETA-BLOCKERS
139011	CARDIOVASCULAR
28947	ANTICOAGULANTS
223248	CARDIOVASCULAR
127861	CARDIOVASCULAR
128076	CARDIOVASCULAR
219045	CARDIOVASCULAR
220630	ANTICOAGULANTS
88551	CARDIOVASCULAR
136119	CARDIOVASCULAR
223926	CARDIOVASCULAR
121666	ANTIPLATELET
140648	CARDIOVASCULAR
11420	CARDIOVASCULAR
11559	ANTIPLATELET
133244	CARDIOVASCULAR
127772	CARDIAC-DRUGS
88552	CARDIOVASCULAR
195943	CARDIOVASCULAR
104984	ANTICOAGULANTS
127812	CARDIAC-DRUGS
33183	STATIN
136852	CARDIOVASCULAR
12411	STATIN
35791	CARDIAC-DRUGS
10357	NITRATE
33184	STATIN
124056	BETA-BLOCKERS
40803005	ANTICOAGULANTS
27472	NITRATE
128453	ANTIPLATELET
130950	ANTICOAGULANTS
40800086	CARDIOVASCULAR
12730	CARDIOVASCULAR
205081	CARDIOVASCULAR
37854	CARDIOVASCULAR
10714	CARDIAC-DRUGS
11983	ANTICOAGULANTS
40800050	CARDIOVASCULAR
19257	STATIN
15982	CARDIAC-DRUGS
9892	CARDIAC-DRUGS
40208	CARDIOVASCULAR
27489	CARDIAC-DRUGS
131194	CARDIOVASCULAR
144031	CARDIOVASCULAR
19256	STATIN
221964	CARDIAC-DRUGS
123103	CARDIOVASCULAR
40801592	CARDIOVASCULAR
40800782	CARDIOVASCULAR
28949	CARDIOVASCULAR
124848	CARDIOVASCULAR
112956	ASPIRIN
122886	ASPIRIN
129142	CARDIOVASCULAR
21053	BETA-BLOCKERS
91078	CARDIAC-DRUGS
7967	BETA-BLOCKERS
12197	CARDIAC-DRUGS
43253	NITRATE
97268	BETA-BLOCKERS
122343	CARDIOVASCULAR
39216	CARDIOVASCULAR
220644	ANTICOAGULANTS
195981	BETA-BLOCKERS
32758	CARDIOVASCULAR
88029	CALCIUM-ANTAGONIST
99857	CARDIOVASCULAR
28137	ASPIRIN
226428	CALCIUM-ANTAGONIST
11502	CARDIOVASCULAR
40802412	CARDIAC-DRUGS
130002	CARDIOVASCULAR
225530	ANTICOAGULANTS
36275	CARDIOVASCULAR
223250	CARDIOVASCULAR
4067	NITRATE
40801142	CARDIOVASCULAR
21349	CARDIOVASCULAR
40801374	CARDIAC-DRUGS
27493	CARDIAC-DRUGS
91081	CARDIAC-DRUGS
88012	CARDIAC-DRUGS
6563	CARDIAC-DRUGS
76482	CARDIAC-DRUGS
22991	BETA-BLOCKERS
220974	CARDIOVASCULAR
129704	CARDIOVASCULAR
40800374	CARDIAC-DRUGS
40801503	CALCIUM-ANTAGONIST
126290	BETA-BLOCKERS
6297	BETA-BLOCKERS
39477	CARDIAC-DRUGS
144361	ASPIRIN
212160	CARDIOVASCULAR
131401	CARDIOVASCULAR
138568	CARDIAC-DRUGS
214877	CARDIOVASCULAR
225278	CARDIOVASCULAR
225276	CARDIOVASCULAR
199059	ANTICOAGULANTS
70778	CARDIOVASCULAR
124901	CARDIOVASCULAR
5617	NITRATE
87820	CARDIOVASCULAR
332	CARDIOVASCULAR
138955	CARDIOVASCULAR
136528	CARDIAC-DRUGS
29352	CARDIAC-DRUGS
89304	BETA-BLOCKERS
139624	CARDIAC-DRUGS
11892	CALCIUM-ANTAGONIST
227120	BETA-BLOCKERS
37856	CARDIOVASCULAR
206814	ANTICOAGULANTS
29888	ASPIRIN
138593	BETA-BLOCKERS
11156	BETA-BLOCKERS
123486	ASPIRIN
195544	CARDIOVASCULAR
27473	NITRATE
10178	ANTICOAGULANTS
128408	ASPIRIN
89307	ASPIRIN
24529	CARDIOVASCULAR
8483	CARDIOVASCULAR
10170	ANTICOAGULANTS
82373	CARDIOVASCULAR
131927	CARDIOVASCULAR
27179	CALCIUM-ANTAGONIST
2529	ANTIPLATELET
97744	CARDIOVASCULAR
211562	CARDIOVASCULAR
103777	ANTICOAGULANTS
111693	CARDIOVASCULAR
16036	CARDIOVASCULAR
40800042	CARDIOVASCULAR
27015	CARDIAC-DRUGS
18797	CALCIUM-ANTAGONIST
224841	ANTICOAGULANTS
122876	ASPIRIN
219549	ANTICOAGULANTS
27475	NITRATE
135600	NITRATE
126544	BETA-BLOCKERS
37041	ANTICOAGULANTS
35594	CARDIAC-DRUGS
5680	CARDIAC-DRUGS
21861	CARDIOVASCULAR
214913	CARDIOVASCULAR
22648	CARDIOVASCULAR
143003	CARDIOVASCULAR
200972	ASPIRIN
14818	CARDIOVASCULAR
129342	CARDIAC-DRUGS
220629	ANTICOAGULANTS
122996	CARDIOVASCULAR
15026	CARDIOVASCULAR
124509	BETA-BLOCKERS
10362	CARDIAC-DRUGS
99573	BETA-BLOCKERS
9270	BETA-BLOCKERS
216064	CARDIAC-DRUGS
18291	CARDIOVASCULAR
144038	CARDIOVASCULAR
78531	BETA-BLOCKERS
194981	CARDIAC-DRUGS
106342	ANTICOAGULANTS
6775	CARDIAC-DRUGS
143754	CARDIOVASCULAR
8894	STATIN
10589	BETA-BLOCKERS
10171	ANTICOAGULANTS
23203	ANTICOAGULANTS
126224	CARDIOVASCULAR
121232	CARDIOVASCULAR
36277	CARDIOVASCULAR
89700	CARDIOVASCULAR
214795	CARDIOVASCULAR
214796	CARDIOVASCULAR
214797	CARDIOVASCULAR
214798	CARDIOVASCULAR
99773	CARDIOVASCULAR
225275	CARDIOVASCULAR
97748	CARDIOVASCULAR
265877	BETA-BLOCKERS
121605	CARDIOVASCULAR
195982	BETA-BLOCKERS
124544	CARDIOVASCULAR
134642	CARDIAC-DRUGS
27495	CARDIAC-DRUGS
2537	CARDIAC-DRUGS
31916	ANTICOAGULANTS
130945	ANTICOAGULANTS
10363	CARDIAC-DRUGS
35841	ANTICOAGULANTS
131475	NITRATE
135596	NITRATE
204866	ANTICOAGULANTS
204863	ANTICOAGULANTS
35180	CALCIUM-ANTAGONIST
97747	CARDIOVASCULAR
144645	STATIN
147427	CARDIOVASCULAR
23025	CARDIAC-DRUGS
39223	CARDIOVASCULAR
216065	CARDIAC-DRUGS
13984	CARDIOVASCULAR
40210	CARDIOVASCULAR
128410	ASPIRIN
20447	ANTIPLATELET
9641	CARDIOVASCULAR
15001	NITRATE
27089	NITRATE
39215	CARDIOVASCULAR
5679	CARDIAC-DRUGS
35499	BETA-BLOCKERS
134138	BETA-BLOCKERS
139012	CARDIAC-DRUGS
131400	CARDIOVASCULAR
206769	ANTICOAGULANTS
40801520	ANTICOAGULANTS
217740	ANTIPLATELET
27016	CARDIAC-DRUGS
88228	ANTICOAGULANTS
213348	ASPIRIN
126538	CARDIAC-DRUGS
126625	BETA-BLOCKERS
24943	ANTIPLATELET
145035	CARDIOVASCULAR
40802198	NITRATE
203171	CARDIAC-DRUGS
37043	ANTICOAGULANTS
122998	BETA-BLOCKERS
13159	CARDIOVASCULAR
145634	ANTICOAGULANTS
137657	CARDIAC-DRUGS
27865	ASPIRIN
217252	BETA-BLOCKERS
195546	CARDIOVASCULAR
19416	ANTICOAGULANTS
6296	BETA-BLOCKERS
135590	NITRATE
21186	CARDIOVASCULAR
132713	CARDIAC-DRUGS
214986	CARDIAC-DRUGS
203209	CARDIOVASCULAR
33182	STATIN
8940	BETA-BLOCKERS
199498	ANTICOAGULANTS
21102	ANTICOAGULANTS
126541	BETA-BLOCKERS
143177	CALCIUM-ANTAGONIST
223249	CARDIOVASCULAR
35181	CALCIUM-ANTAGONIST
31420	BETA-BLOCKERS
89438	CARDIOVASCULAR
35591	CARDIAC-DRUGS
199315	ANTIPLATELET
133247	CARDIOVASCULAR
8939	BETA-BLOCKERS
141947	BETA-BLOCKERS
88555	CARDIOVASCULAR
133117	CARDIOVASCULAR
15849	ANTICOAGULANTS
9269	BETA-BLOCKERS
121487	CARDIAC-DRUGS
225279	CARDIOVASCULAR
27501	CALCIUM-ANTAGONIST
225274	CARDIOVASCULAR
87817	CARDIOVASCULAR
263279	CARDIOVASCULAR
2536	CARDIAC-DRUGS
199280	CALCIUM-ANTAGONIST
123881	CARDIOVASCULAR
40801271	CARDIAC-DRUGS
135518	CARDIAC-DRUGS
27476	NITRATE
140646	CARDIOVASCULAR
140748	ASPIRIN
76399	CARDIOVASCULAR
130792	ASPIRIN
145036	CARDIOVASCULAR
132085	NITRATE
221770	CARDIAC-DRUGS
1964	ANTICOAGULANTS
28948	CARDIOVASCULAR
132027	NITRATE
100417	CARDIOVASCULAR
23204	ANTICOAGULANTS
122342	CARDIOVASCULAR
262843	CARDIOVASCULAR
1422	CARDIOVASCULAR
138387	CARDIAC-DRUGS
141938	CARDIAC-DRUGS
143712	ANTICOAGULANTS
14960	ANTICOAGULANTS
14959	ANTICOAGULANTS
5328	BETA-BLOCKERS
113608	CARDIOVASCULAR
40801874	ANTICOAGULANTS
11719	ANTICOAGULANTS
134187	CARDIOVASCULAR
131533	BETA-BLOCKERS
127733	ASPIRIN
97746	CARDIOVASCULAR
14204	ANTICOAGULANTS
127813	CARDIAC-DRUGS
125811	ANTIPLATELET
199499	ANTICOAGULANTS
130952	ANTICOAGULANTS
9680	CARDIOVASCULAR
4081	CARDIOVASCULAR
6464	STATIN
225290	CARDIOVASCULAR
225282	CARDIOVASCULAR
78658	CARDIOVASCULAR
205155	NITRATE
192968	CALCIUM-ANTAGONIST
19255	ASPIRIN
223325	CARDIOVASCULAR
211358	CARDIOVASCULAR
138590	BETA-BLOCKERS
134165	STATIN
38234	CARDIAC-DRUGS
109786	ANTICOAGULANTS
122751	ANTICOAGULANTS
132575	BETA-BLOCKERS
134096	CARDIOVASCULAR
76355	CARDIOVASCULAR
29335	BETA-BLOCKERS
223144	CARDIOVASCULAR
123099	CARDIOVASCULAR
40800122	CARDIOVASCULAR
128142	CARDIAC-DRUGS
22133	CARDIOVASCULAR
100141	CARDIOVASCULAR
18765	CARDIAC-DRUGS
38828	CARDIOVASCULAR
8895	STATIN
11505	CARDIOVASCULAR
136118	CARDIOVASCULAR
20446	ANTIPLATELET
10590	BETA-BLOCKERS
40802053	ANTICOAGULANTS
204865	ANTICOAGULANTS
27719	CARDIOVASCULAR
124996	CARDIAC-DRUGS
134186	CARDIOVASCULAR
4586	CARDIOVASCULAR
124425	ASPIRIN
123702	CARDIOVASCULAR
9642	CARDIOVASCULAR
5602	NITRATE
102967	ANTICOAGULANTS
24342	CARDIOVASCULAR
99856	CARDIOVASCULAR
19450	CARDIOVASCULAR
141569	CARDIOVASCULAR
82371	CARDIOVASCULAR
136655	CARDIAC-DRUGS
199227	ANTIPLATELET
40802570	CARDIAC-DRUGS
37852	CARDIOVASCULAR
40801591	CARDIOVASCULAR
102034	CARDIOVASCULAR
138940	CARDIOVASCULAR
S1755	ASPIRIN
